# Supplementary material
Source: PubMed Central journal article supplement (PMC3962995)
Supplement: supp_82.12.1083_Appendices_e-3-4.pdf [file supp_82.12.1083_Appendices_e-3-4.pdf]

## Appendices e-3 and e-4: Search strategies

### *Medline*

Database: Ovid MEDLINE(R) <1950 to June Week 2 2007>

Search Strategy:

---

- 1 exp Multiple Sclerosis/ (29315)
- 2 multiple sclerosis.tw. (28823)
- 3 Complementary Therapies/ (9392)
- 4 (Complementary and Alternative Medicine).tw. (1745)
- 5 unconventional medicine.mp. (65)
- 6 swank diet:.mp. (0)
- 7 Diet, Fat-Restricted/ (1739)
- 8 Dietary Fats/ (32534)
- 9 low fat diet:.mp. (2250)
- 10 gluten free diet:.mp. (1838)
- 11 fatty acids, unsaturated/ or exp fatty acids, essential/ or exp fatty acids, omega-3/ (48710)
- 12 fish oils/ or cod liver oil/ (4455)
- 13 Linseed Oil/ (473)
- 14 fatty acids, unsaturated/ or exp fatty acids, omega-6/ (21440)
- 15 sunflower seed oil:.mp. (768)
- 16 evening primrose oil:.mp. (334)
- 17 lorenzo's oil:.mp. (95)
- 18 (polyunsaturated fatty acid: or essential fatty acid: or omega 3 fatty acid: or omega three fatty acid: or fish oil: or cod liver oil: or flaxseed oil: or omega 6 fatty acid: or omega six fatty acid: or linolenic acid: or gamma linolenic acid:).mp. (22036)
- 19 or/3-18 (97863)

- 20 clinical trials/ or randomized controlled trials/ (179903)
- 21 epidemiologic methods/ or exp case-control studies/ or exp cohort studies/ (911411)
- 22 case series.mp. (12250)
- 23 n=1:.ab. (39398)
- 24 and/22-23 (74)
- 25 or/20-21,24 (1073647)
- 26 or/1-2 (34470)
- 27 and/19,26 (367)
- 28 limit 27 to (humans and systematic reviews and yr="1970 - 2007") (5)
- 29 limit 27 to (humans and yr="1970 - 2007" and (meta analysis or randomized controlled trial or "review")) (97)
- 30 and/25,27 (36)
- 31 limit 30 to (humans and yr="1970 - 2007") (36)
- 32 or/28-29,31 (121)
- 33 limit 32 to english language (102)

***Medline updated***

**Ovid MEDLINE(R) 1948 to March Week 3 2011**

| # | Searches                                                          | Results | Search Type |
|---|-------------------------------------------------------------------|---------|-------------|
| 1 | exp Multiple Sclerosis/                                           | 36400   | Advanced    |
| 2 | multiple sclerosis.tw.                                            | 37010   | Advanced    |
| 3 | clinical trials/ or randomized controlled trials/                 | 71382   | Advanced    |
| 4 | epidemiologic methods/ or exp case-control studies/ or exp cohort | 1202336 | Advanced    |

|    |                                                                                                            |         |          |
|----|------------------------------------------------------------------------------------------------------------|---------|----------|
|    | studies/                                                                                                   |         |          |
| 5  | case series.mp.                                                                                            | 21253   | Advanced |
| 6  | n=1:.ab.                                                                                                   | 62540   | Advanced |
| 7  | and/5-6                                                                                                    | 197     | Advanced |
| 8  | or/3-4,7                                                                                                   | 1264046 | Advanced |
| 9  | carnitine/ or acetylcarnitine/                                                                             | 6886    | Advanced |
| 10 | exp Chondroitin/                                                                                           | 8414    | Advanced |
|    | (acetyl l carnitine or calcium ethyl amino phosphate or calcium                                            |         |          |
| 11 | orotate or calcium aep or calcium eap or calcium 2 aminoethyl phosphate or chondroitin).mp.                | 15810   | Advanced |
| 12 | (9007-27-6 or 14992-62-2).rn.                                                                              | 3950    | Advanced |
| 13 | Ubiquinone/                                                                                                | 5603    | Advanced |
| 14 | creatine/                                                                                                  | 7160    | Advanced |
| 15 | exp Dehydroepiandrosterone/                                                                                | 9394    | Advanced |
| 16 | Germanium/                                                                                                 | 902     | Advanced |
| 17 | exp Glucosamine/                                                                                           | 11672   | Advanced |
| 18 | (coenzyme q10 or ubiquinone or creatine or dhea or dehydroepiandrosterone or germanium or glucosamine).mp. | 76655   | Advanced |
| 19 | (1339-63-5 or 303-98-0 or 57-00-1 or 53-43-0 or 7440-56-4 or 3416-24-8).rn.                                | 30186   | Advanced |
| 20 | exp Inosine/                                                                                               | 5546    | Advanced |

|                                                                                                   |        |          |
|---------------------------------------------------------------------------------------------------|--------|----------|
| 21 Melatonin/                                                                                     | 13249  | Advanced |
| 22 Thioctic Acid/                                                                                 | 2409   | Advanced |
| 23 Threonine/                                                                                     | 8085   | Advanced |
| 24 Garcinia mangostana/                                                                           | 70     | Advanced |
| 25 (inosine or melatonin or lipoic acid or thioctic acid or threonine or mangosteen).mp.          | 93742  | Advanced |
| 26 (58-63-9 or 73-31-4 or 62-46-4 or 72-19-5).rn.                                                 | 26593  | Advanced |
| 27 Curcuma/                                                                                       | 610    | Advanced |
| 28 Curcumin/                                                                                      | 2847   | Advanced |
| 29 Catechols/                                                                                     | 5088   | Advanced |
| 30 exp Flavonoids/                                                                                | 51119  | Advanced |
| 31 Quercetin/                                                                                     | 4325   | Advanced |
| 32 Luteolin/                                                                                      | 625    | Advanced |
| 33 (tumeric or curcumin or flavonoid\$ or quercetin or luteolin or oral myelin or oral brain).mp. | 35611  | Advanced |
| 34 (458-37-7 or 117-39-5 or 491-70-3).rn.                                                         | 7606   | Advanced |
| 35 or/9-34                                                                                        | 256560 | Advanced |
| 36 or/1-2                                                                                         | 43538  | Advanced |
| 37 and/35-36                                                                                      | 493    | Advanced |
| 38 limit 37 to (humans and english language and systematic reviews)                               | 6      | Advanced |

|    |                                                                                                          |    |          |
|----|----------------------------------------------------------------------------------------------------------|----|----------|
| 39 | limit 37 to (humans and english language and (meta analysis or randomized controlled trial or "review")) | 93 | Advanced |
| 40 | and/8,35-36                                                                                              | 72 | Advanced |
| 41 | limit 40 to (english language and humans)                                                                | 68 | Advanced |

Citations entry from 2007-2010

|    |           |         |          |
|----|-----------|---------|----------|
| 42 | 2007*.em. | 711002  | Advanced |
| 43 | 2008*.em. | 722709  | Advanced |
| 44 | 2009*.em. | 710184  | Advanced |
| 45 | 2010*.em. | 767490  | Advanced |
| 46 | 2011*.em. | 162402  | Advanced |
| 47 | or/42-46  | 3073787 | Advanced |
| 48 | 41 and 47 | 19      | Advanced |

**Ovid MEDLINE(R) 1948 to March Week 3 2011**

| # | Searches                                                                   | Results | Search Type |
|---|----------------------------------------------------------------------------|---------|-------------|
| 1 | exp Multiple Sclerosis/                                                    | 36400   | Advanced    |
| 2 | multiple sclerosis.tw.                                                     | 37010   | Advanced    |
| 3 | clinical trials/ or randomized controlled trials/                          | 71382   | Advanced    |
| 4 | epidemiologic methods/ or exp case-control studies/ or exp cohort studies/ | 1202336 | Advanced    |
| 5 | case series.mp.                                                            | 21253   | Advanced    |

|    |                                                                                                                                                                                                                                                                                                                                                                                                                          |         |          |
|----|--------------------------------------------------------------------------------------------------------------------------------------------------------------------------------------------------------------------------------------------------------------------------------------------------------------------------------------------------------------------------------------------------------------------------|---------|----------|
| 6  | n=1:.ab.                                                                                                                                                                                                                                                                                                                                                                                                                 | 62540   | Advanced |
| 7  | and/5-6                                                                                                                                                                                                                                                                                                                                                                                                                  | 197     | Advanced |
| 8  | or/3-4,7                                                                                                                                                                                                                                                                                                                                                                                                                 | 1264046 | Advanced |
| 9  | Aspartame/                                                                                                                                                                                                                                                                                                                                                                                                               | 741     | Advanced |
| 10 | dipeptides/ or aspartic acid/ or phenylalanine/                                                                                                                                                                                                                                                                                                                                                                          | 47498   | Advanced |
| 11 | venoms/ or bee venoms/                                                                                                                                                                                                                                                                                                                                                                                                   | 7243    | Advanced |
| 12 | Chelation Therapy/                                                                                                                                                                                                                                                                                                                                                                                                       | 879     | Advanced |
| 13 | exp Chelating Agents/tu [Therapeutic Use]                                                                                                                                                                                                                                                                                                                                                                                | 9881    | Advanced |
| 14 | exp cryotherapy/                                                                                                                                                                                                                                                                                                                                                                                                         | 18267   | Advanced |
| 15 | Dental Amalgam/                                                                                                                                                                                                                                                                                                                                                                                                          | 7685    | Advanced |
| 16 | Mercury/                                                                                                                                                                                                                                                                                                                                                                                                                 | 17065   | Advanced |
| 17 | Hyperbaric Oxygenation/                                                                                                                                                                                                                                                                                                                                                                                                  | 9169    | Advanced |
| 18 | LDN.mp.                                                                                                                                                                                                                                                                                                                                                                                                                  | 268     | Advanced |
| 19 | GalNAcbeta1,4GlcNAc.mp.                                                                                                                                                                                                                                                                                                                                                                                                  | 32      | Advanced |
| 20 | (aspartame or bee venom therap\$ or apitherap\$ or candida treatment\$ or candidiasis hypersensitivities or candidiasis hypersenitivity or polysystemic candidiasis or chelation therap\$ or cooling therap\$ or dental amalgam\$ or mercury or enzyme therap\$ or hyperbaric oxygen or low dose naltrexone or neural therap\$ or prokarin or procarin or hydrolytic enzyme\$ or colloidal silver or radon therap\$).mp. | 45742   | Advanced |
| 21 | or/9-20                                                                                                                                                                                                                                                                                                                                                                                                                  | 131860  | Advanced |

|    |                                                                                                          |       |          |
|----|----------------------------------------------------------------------------------------------------------|-------|----------|
| 22 | or/1-2                                                                                                   | 43538 | Advanced |
| 23 | and/21-22                                                                                                | 471   | Advanced |
| 24 | limit 23 to (humans and english language and systematic reviews)                                         | 6     | Advanced |
| 25 | limit 23 to (humans and english language and (meta analysis or randomized controlled trial or "review")) | 86    | Advanced |
| 26 | and/8,21-22                                                                                              | 65    | Advanced |
| 27 | limit 26 to (humans and english language)                                                                | 65    | Advanced |

Citations entry from 2007-2010

|    |           |         |          |
|----|-----------|---------|----------|
| 28 | 2007*.em. | 711002  | Advanced |
| 29 | 2008*.em. | 722709  | Advanced |
| 30 | 2009*.em. | 710184  | Advanced |
| 31 | 2010*.em. | 767490  | Advanced |
| 32 | 2011*.em. | 162402  | Advanced |
| 33 | or/28-32  | 3073787 | Advanced |
| 34 | 27 and 33 | 17      | Advanced |

**Ovid MEDLINE(R) 1948 to March Week 3 2011**

| # | Searches                | Results | Search Type |
|---|-------------------------|---------|-------------|
| 1 | exp Multiple Sclerosis/ | 36400   | Advanced    |
| 2 | multiple sclerosis.tw.  | 37010   | Advanced    |

|    |                                                                                                                                                                                                                  |         |          |
|----|------------------------------------------------------------------------------------------------------------------------------------------------------------------------------------------------------------------|---------|----------|
| 3  | clinical trials/ or randomized controlled trials/                                                                                                                                                                | 71382   | Advanced |
| 4  | epidemiologic methods/ or exp case-control studies/ or exp cohort studies/                                                                                                                                       | 1202336 | Advanced |
| 5  | case series.mp.                                                                                                                                                                                                  | 21253   | Advanced |
| 6  | n=1:.ab.                                                                                                                                                                                                         | 62540   | Advanced |
| 7  | and/5-6                                                                                                                                                                                                          | 197     | Advanced |
| 8  | exp Antioxidants/                                                                                                                                                                                                | 296761  | Advanced |
| 9  | exp Vitamin A/                                                                                                                                                                                                   | 33856   | Advanced |
| 10 | exp Vitamin E/                                                                                                                                                                                                   | 24646   | Advanced |
| 11 | Zinc/                                                                                                                                                                                                            | 42973   | Advanced |
| 12 | exp Ascorbic Acid/                                                                                                                                                                                               | 32068   | Advanced |
| 13 | exp Vitamin B 12/                                                                                                                                                                                                | 16886   | Advanced |
| 14 | Selenium/                                                                                                                                                                                                        | 14574   | Advanced |
| 15 | Calcium/                                                                                                                                                                                                         | 221644  | Advanced |
| 16 | Magnesium/                                                                                                                                                                                                       | 58084   | Advanced |
| 17 | exp Folic Acid/                                                                                                                                                                                                  | 25075   | Advanced |
| 18 | (antioxidant: or vitamin A or vitamin C or ascorbic acid or vitamin E or vitamin B12 or vitamin B or cyanocobalamin or vitamin D or calcium or selenium or zinc or magnesium or folic acid or multivitamin:).tw. | 485839  | Advanced |
| 19 | exp Vitamin B Complex/                                                                                                                                                                                           | 110239  | Advanced |
| 20 | (12001-76-2 or 11103-57-4 or 7440-66-6 or 1406-18-4 or 50-81-7 or                                                                                                                                                | 400114  | Advanced |



68-19-9 or 7782-49-2 or 7440-70-2 or 7439-95-4 or 59-30-3).rn.

|                                                                                                             |         |          |
|-------------------------------------------------------------------------------------------------------------|---------|----------|
| 21 or/1-2                                                                                                   | 43538   | Advanced |
| 22 or/3-4,7                                                                                                 | 1264046 | Advanced |
| 23 or/8-20                                                                                                  | 918723  | Advanced |
| 24 and/21-23                                                                                                | 121     | Advanced |
| 25 limit 24 to (humans and english language)                                                                | 114     | Advanced |
| 26 and/21,23                                                                                                | 1422    | Advanced |
| 27 limit 26 to (humans and english language and systematic reviews)                                         | 9       | Advanced |
| 28 limit 26 to (humans and english language and (meta analysis or randomized controlled trial or "review")) | 332     | Advanced |
| 29 or/25,27-28                                                                                              | 433     | Advanced |

Citations entry from 2007-2011

|              |         |          |
|--------------|---------|----------|
| 30 2007*.em. | 711002  | Advanced |
| 31 2008*.em. | 722709  | Advanced |
| 32 2009*.em. | 710184  | Advanced |
| 33 2010*.em. | 767490  | Advanced |
| 34 2011*.em. | 162402  | Advanced |
| 35 or/30-34  | 3073787 | Advanced |
| 36 29 and 35 | 182     | Advanced |

## *Web of Science*

Search strategy Web of Science\_MS\_CAM

TS=((("multiple sclerosis") AND ("unconventional medicine?" OR "complementary medicine?" OR "complementary therapy" OR "complementary therapies" OR "alternative medicine?" OR "alternative therapy" OR " alternative therapies" OR "swank diet?" OR "low fat diet?" OR "gluten free diet?" OR "polyunsaturated fatty acid?" OR "essential fatty acid?" OR "omega three fatty acid?" OR "omega 3 fatty acid?" OR "fish oil?" OR "cod liver oil?" OR "flaxseed oil?" OR "omega 6 fatty acid?" OR "omega six fatty acid?" OR "sunflower seed oil?" OR "linoleic acid?" OR "gamma linolenic acid?" OR "lorenzo's oil?" OR "lorenzos oil?")) NOT animal?)

DocType=All document types; Language=English; Database=SCI-EXPANDED;

Timespan=1970-2007

DocType=[excluding] MEETING ABSTRACT, LETTER, NOTE > DocType=[excluding] EDITORIAL MATERIAL

Web of Science\_MS\_CAM\_manipulative

#5 0 TS(("multiple sclerosis") AND ("pulsed Enermed")) DocType=All document types; Language=English; Database=SCI-EXPANDED; Timespan=1970-2007

#4 0 TS(("multiple sclerosis" AND Enermed AND pulsed)

DocType=All document types; Language=English; Database=SCI-EXPANDED;

Timespan=1970-2007

#3 61 TS((((("multiple sclerosis") AND (magnet? OR "electromagnetic therapy" OR "electromagnetic therapies" OR "magnetic field?" OR " electromagnetic field?" OR "therapeutic touch")) NOT ("magnetic resonance imag\*" OR "magnetic resonance spectroscopy"))

DocType=All document types; Language=English; Database=SCI-EXPANDED;

Timespan=1970-2007

#2 10 TS(("multiple sclerosis") AND ("chiropractic medicine" OR "craniosacral therapy" OR "craniosacral therapies" OR "cranial therapy" OR "cranial therapies" OR "cranial

osteopathy" OR "cranial osteopathies" OR craniopathy OR craniopathies OR feldenkrais\* OR  
massage OR pilates OR physicalmind OR "physical mind" OR reflexology OR tragerwork OR  
"trager work" OR "trager approach" OR "trager psychophysical integration"))

DocType=All document types; Language=English; Database=SCI-EXPANDED;  
Timespan=1970-2007

#1 9 TS(("multiple sclerosis") AND ("colon therapy" OR "colon therapies" OR  
detoxification OR hippotherapy OR hippotherapies OR "therapeutic horseback riding" OR  
"therapeutic riding"))

DocType=All document types; Language=English; Database=SCI-EXPANDED;  
Timespan=1970-2007
