# Supplementary material
Source: PubMed Central journal article supplement (PMC3962995)
Supplement: supp_82.12.1083_Table_e-1.pdf [file supp_82.12.1083_Table_e-1.pdf]

**Table e-1 Commonly used scales and outcome measures**

| <b>Objective outcome</b>                        | <b>Measure</b>                                                                                                            | <b>Scale range</b>                                                                                                                                                                                                                                                        |
|-------------------------------------------------|---------------------------------------------------------------------------------------------------------------------------|---------------------------------------------------------------------------------------------------------------------------------------------------------------------------------------------------------------------------------------------------------------------------|
| EDSS <sup>e14</sup>                             | Disability                                                                                                                | <ul style="list-style-type: none"> <li>Divided into 20 half steps ranging from 0 (normal) to 10 (death due to MS)</li> </ul>                                                                                                                                              |
| FSS <sup>14</sup>                               | Disability                                                                                                                |                                                                                                                                                                                                                                                                           |
| FSSs <sup>14</sup>                              | Disability                                                                                                                | <ul style="list-style-type: none"> <li>Subscores of the EDSS</li> <li>0–5/6 (higher scores suggests higher disability)</li> </ul>                                                                                                                                         |
| MSFC <sup>e15</sup>                             | Disability<br><br>Composite of 3 variables (Timed 25-Foot walk, 9-Hole Peg Test, and Paced Auditory Serial Addition Test) | <ul style="list-style-type: none"> <li>Results from each of the 3 tests are transformed into Z-scores and averaged to yield a composite score for each patient at each time point</li> </ul>                                                                              |
| 9-HPT <sup>e15</sup>                            | Hand function                                                                                                             | <ul style="list-style-type: none"> <li>Part of the MSFC</li> </ul>                                                                                                                                                                                                        |
| PASAT <sup>e15</sup>                            | Cognition                                                                                                                 | <ul style="list-style-type: none"> <li>Part of the MSFC</li> </ul>                                                                                                                                                                                                        |
| GNDS <sup>e16</sup>                             | Disability                                                                                                                | <ul style="list-style-type: none"> <li>Sum score of the 12 subcategories, range 0 (normal) to 60 (maximum possible disability)</li> </ul>                                                                                                                                 |
| BBS <sup>e17</sup> ( Berg Balance Scale):       | Balance                                                                                                                   | <ul style="list-style-type: none"> <li>Measures postural stability during sitting, standing, walking, changing positions, and reaching</li> <li>14 items, 4-point (0 - cannot perform to 4 - normal) performance rating scale</li> <li>Score ranges from 0 -56</li> </ul> |
| TUG <sup>e17, e18</sup> (Timed Up and Go) Test: | Mobility                                                                                                                  | Measures the time needed for a patient to get up from an armchair (46 cm high), walk 3 m, turn around, and sit down in the chair again                                                                                                                                    |
| Ashworth Scale <sup>e19</sup>                   | Spasticity                                                                                                                |                                                                                                                                                                                                                                                                           |
| <b>Subjective outcomes</b>                      |                                                                                                                           |                                                                                                                                                                                                                                                                           |
| MSIS-29 <sup>e20</sup>                          |                                                                                                                           | <ul style="list-style-type: none"> <li>The summary scores of the 2 MSIS-29 scales, physical and psychological impact, are generated by summing the individual items (scored 1–5) and then transforming</li> </ul>                                                         |

|                        |                 |                                                                                                                                                                                                                                                                                                                                                                                                                                                                                                           |
|------------------------|-----------------|-----------------------------------------------------------------------------------------------------------------------------------------------------------------------------------------------------------------------------------------------------------------------------------------------------------------------------------------------------------------------------------------------------------------------------------------------------------------------------------------------------------|
|                        |                 | <p>these to a 0–100 scale</p> <ul style="list-style-type: none"> <li>• Higher scores indicate worse health</li> </ul>                                                                                                                                                                                                                                                                                                                                                                                     |
| FSS <sup>e21</sup>     | Fatigue         | <ul style="list-style-type: none"> <li>• Scores range from 1–7</li> <li>• Higher scores indicate higher levels of fatigue</li> <li>• Scores of <math>\geq 4</math> indicative of significant fatigue</li> </ul>                                                                                                                                                                                                                                                                                           |
| FIS <sup>e22</sup>     | Fatigue         | <ul style="list-style-type: none"> <li>• Consists of 40 items, each of which is scored 0 (no problem) to 4 (extreme problem)</li> <li>• Is continuous scale of 0–160</li> <li>• Composed of 3 subscales that describe how fatigue impacts cognitive (10 items), physical (10 items), and psychosocial functioning (10 items)</li> </ul>                                                                                                                                                                   |
| MFIS <sup>e23</sup>    | Fatigue         | <ul style="list-style-type: none"> <li>• Part of MSQLI; is a modified form of the Fatigue Impact Scale</li> <li>• Full-length MFIS consists of 21 items (10 cognitive, 11 physical, and 2 psychosocial)</li> <li>• Abbreviated MFIS has 5 items</li> <li>• Total MFIS score range, from 0–84. It is computed by adding scores on the Physical (0–36) + Cognitive (0–40) + Psychosocial (0–8) subscales</li> <li>• Higher scores indicate a greater impact of fatigue on a patient’s activities</li> </ul> |
| SF-36 <sup>e25</sup>   | Quality of life | <ul style="list-style-type: none"> <li>• Part of MSQLI (see below)</li> <li>• Higher score indicates better health</li> </ul>                                                                                                                                                                                                                                                                                                                                                                             |
| HAQUAMS <sup>e26</sup> | Quality of life | <ul style="list-style-type: none"> <li>• Assesses subscales: communication, mood, upper-limb mobility, lower-limb mobility, and fatigue</li> <li>• 38 items</li> <li>• Subscale and total scores range from 1 to 5, high scores indicating low quality of life</li> </ul>                                                                                                                                                                                                                                 |
| MSQLI <sup>e27</sup>   | Quality of life | <ul style="list-style-type: none"> <li>• Does not provide a single number to summarize quality of life</li> <li>• Provides several scores, each of which represents one specific facet of quality of life</li> <li>• 10 scales (a total of 138 items) as follows</li> <li>➤ Health Status Questionnaire (SF-36) - 36 items</li> </ul>                                                                                                                                                                     |

|                      |                        |                                                                                                                                                                                                                                                                                                                            |
|----------------------|------------------------|----------------------------------------------------------------------------------------------------------------------------------------------------------------------------------------------------------------------------------------------------------------------------------------------------------------------------|
|                      |                        | <ul style="list-style-type: none"> <li>➤ MFIS - 21 items</li> <li>➤ PES - 6 items</li> <li>➤ SSS - 5 items</li> <li>➤ BLCS - 4 items</li> <li>➤ BWCS - 5 items</li> <li>➤ IVIS - 5 items</li> <li>➤ PDQ - 20 items</li> <li>➤ MHI - 18 items</li> <li>➤ MSSS - 18 items</li> </ul>                                         |
| QOL                  | Quality of life        |                                                                                                                                                                                                                                                                                                                            |
| CES-D <sup>e30</sup> | Depression             | <ul style="list-style-type: none"> <li>• 20 questions</li> <li>• Range of scores 0–60 (&lt; 15: no depression; 15-21: Mild to Moderate Depression; &gt; 21: Possibility of Major Depression)</li> <li>• Higher score indicates presence of more symptomatology</li> </ul>                                                  |
| BDI <sup>e31</sup>   | Depression             | <ul style="list-style-type: none"> <li>• 21 questions</li> <li>• Score ranges from 0–63 (0–9: indicates minimal depression; 10–18: indicates mild depression; 19–29: indicates moderate depression; 30–63: indicates severe depression)</li> <li>• Higher total scores indicate more severe depressive symptoms</li> </ul> |
| HADS <sup>e32</sup>  | Anxiety and depression | <ul style="list-style-type: none"> <li>• A 14-item scale</li> <li>• Grading ranges from 0–11+ (grading: 0–7 = Non-case; 8–10 = Borderline case; 11+ = Case)</li> </ul>                                                                                                                                                     |
| STAI <sup>e33</sup>  | Anxiety                | <ul style="list-style-type: none"> <li>• Consists of 2 subscales; the first measures state anxiety, the second measures trait anxiety</li> <li>• Scores range from 20–80</li> <li>• Higher score indicates greater anxiety</li> </ul>                                                                                      |
| PQOLC <sup>e29</sup> | Quality of life        | <ul style="list-style-type: none"> <li>• 40-item, 5-point (1, “not at all,” to 5, “very much”) scale</li> <li>• Assesses 6 dimensions of quality of life over the previous 7 days: (General functional status; 8 items; ability to enjoy life and to relax; 8 items; positive affect:</li> </ul>                           |

|                                                                   |                     |                                                                                                                                                                                                                                                                                                                                                                                |
|-------------------------------------------------------------------|---------------------|--------------------------------------------------------------------------------------------------------------------------------------------------------------------------------------------------------------------------------------------------------------------------------------------------------------------------------------------------------------------------------|
|                                                                   |                     | 5 items; negative affect: 8 items; ability to maintain and develop social contacts: 6 items; sense of belonging: 5 items)                                                                                                                                                                                                                                                      |
| GHQ-30 <sup>e34</sup>                                             | Mental health       | <ul style="list-style-type: none"> <li>• 30-item questionnaire</li> <li>• 4-point scoring system</li> <li>• Higher scores indicate a more severe condition</li> </ul>                                                                                                                                                                                                          |
| RMI <sup>e37, e38</sup>                                           | Mobility/Disability | <ul style="list-style-type: none"> <li>• 15 items</li> <li>• Range of score: 0–15 (0 = inability to perform any activity on the scale)</li> <li>• Higher scores indicate better mobility performance</li> </ul>                                                                                                                                                                |
| VAS                                                               | Pain                | <ul style="list-style-type: none"> <li>• Scoring ranges from 0–100 mm (0 = no pain, 100 = severe pain)</li> </ul>                                                                                                                                                                                                                                                              |
| PSS                                                               |                     |                                                                                                                                                                                                                                                                                                                                                                                |
| NRS                                                               |                     | <ul style="list-style-type: none"> <li>• Range of score 0–10 (0 = no pain, 10 = severe pain)</li> </ul>                                                                                                                                                                                                                                                                        |
| CSS <sup>e36</sup>                                                | Constipation        | <ul style="list-style-type: none"> <li>• Questionnaire</li> <li>• Scores range from 0–30 (0 = normal and 30 = severe constipation)</li> </ul>                                                                                                                                                                                                                                  |
| FAMS <sup>e28</sup> (Functional Assessment of Multiple Sclerosis) | Quality of life     | <ul style="list-style-type: none"> <li>• A 44-item self-report questionnaire</li> <li>• 6 subscales (measures mobility, symptoms, emotional well being/depression, general contentment, thinking/fatigue, and family/social well being)</li> <li>• Uses a 5-point Likert-type scale with scores ranging from 0 (not at all) to 4 (very much) for each of the items.</li> </ul> |
| RMDQ <sup>e35</sup>                                               | Lower back pain     | <ul style="list-style-type: none"> <li>• 24-item questionnaire</li> <li>• Scores range from 0–24</li> <li>• Higher score indicative of greater lower back pain</li> </ul>                                                                                                                                                                                                      |
| SFQ <sup>e24</sup>                                                | Fatigue             | <ul style="list-style-type: none"> <li>• 4 questions</li> <li>• 7-point scoring system</li> </ul>                                                                                                                                                                                                                                                                              |

9-HPT = 9-Hole Peg Test, BBS = Berg Balance Scale, BDI = Beck Depression Inventory, BLCS = Bladder Control Scale, BWCS = Bowel Control Scale, CES-D = Center for Epidemiologic Studies Depression Scale questionnaire, CSS = Constipation Scoring System, EDSS = Kurtzke Expanded Disability Status Scale, FAMS = Functional Assessment of Multiple Sclerosis, FIS = Fatigue Impact Scale, FSs = Functional Systems, FSS = Fatigue Severity Scale, FSSs = Functional System Scores, GHQ-30 = General Health Questionnaire-30, GNDS = UK Guy's Neurological Disability Scale, HADS = Hospital Anxiety and Depression Scale, HAQUAMS = Hamburg Quality of Life Questionnaire for Multiple Sclerosis, IVIS = Impact of Visual Impairment Scale, MFIS = Modified Fatigue Impact Scale, MHI = Mental Health Inventory, MSFC = Multiple Sclerosis Functional Composite, MSIS-29 = Multiple Sclerosis Impact Scale-29, MSQLI = Multiple Sclerosis Quality of Life Inventory, MSSS = MOS Modified Social Support Survey, NRS = Numeric rating scale, PDQ = Perceived Deficits Questionnaire, PES = MOS Pain Effects Scale, PQOLC = Profile of Health-Related Quality of Life for the Chronically Ill, PASAT = Paced Auditory Serial Addition Test, PSS = Primary symptom score, QOL = Quality of Life, RMDQ = Roland Morris Disability Questionnaire, RMI = Rivermead Mobility Index, SF-36 = Short Form-36, SFQ = Shortened Fatigue Questionnaire, SSS = Sexual Satisfaction Scale, STAI = Spielberger State-Trait Anxiety Inventory, TUG = Timed Up and Go test, VAS = Visual analog scale.
