# Supplementary material
Source: PubMed Central journal article supplement (PMC3962995)
Supplement: supp_82.12.1083_Table_e-2.pdf [file supp_82.12.1083_Table_e-2.pdf]

**Table e-2 Summary of included studies**

| Intervention                        | Evidence rating                                                                                                                                                                                                                                                                                                                                                                                                                                                                                             | No. of studies included | Class I studies                                                                                                                                                                  | Class II studies                                                                                                         | Class III studies                                                                                                                                                                                                                                                           | Class IV studies                |
|-------------------------------------|-------------------------------------------------------------------------------------------------------------------------------------------------------------------------------------------------------------------------------------------------------------------------------------------------------------------------------------------------------------------------------------------------------------------------------------------------------------------------------------------------------------|-------------------------|----------------------------------------------------------------------------------------------------------------------------------------------------------------------------------|--------------------------------------------------------------------------------------------------------------------------|-----------------------------------------------------------------------------------------------------------------------------------------------------------------------------------------------------------------------------------------------------------------------------|---------------------------------|
| <b>Mind–body medicine</b>           |                                                                                                                                                                                                                                                                                                                                                                                                                                                                                                             |                         |                                                                                                                                                                                  |                                                                                                                          |                                                                                                                                                                                                                                                                             |                                 |
| Biofeedback                         | U                                                                                                                                                                                                                                                                                                                                                                                                                                                                                                           | 2                       | –                                                                                                                                                                                | --                                                                                                                       | Klarskov 1994 <sup>e40</sup>                                                                                                                                                                                                                                                | Wiesel 2000 <sup>e151</sup>     |
| Music therapy                       | U                                                                                                                                                                                                                                                                                                                                                                                                                                                                                                           | 2                       | --                                                                                                                                                                               | --                                                                                                                       | Schmid 2004, <sup>e42</sup> Wiens 1999 <sup>e43</sup>                                                                                                                                                                                                                       | –                               |
| Mindfulness training                | U                                                                                                                                                                                                                                                                                                                                                                                                                                                                                                           | 1                       | --                                                                                                                                                                               | --                                                                                                                       | Grossman 2010 <sup>e45</sup>                                                                                                                                                                                                                                                | --                              |
| Hypnosis                            | U                                                                                                                                                                                                                                                                                                                                                                                                                                                                                                           | 1                       |                                                                                                                                                                                  |                                                                                                                          | Jensen 2011 <sup>e41</sup>                                                                                                                                                                                                                                                  |                                 |
| <b>Biologically based practices</b> |                                                                                                                                                                                                                                                                                                                                                                                                                                                                                                             |                         |                                                                                                                                                                                  |                                                                                                                          |                                                                                                                                                                                                                                                                             |                                 |
| <b>Herbs</b>                        |                                                                                                                                                                                                                                                                                                                                                                                                                                                                                                             |                         |                                                                                                                                                                                  |                                                                                                                          |                                                                                                                                                                                                                                                                             |                                 |
| Padma 28                            | U                                                                                                                                                                                                                                                                                                                                                                                                                                                                                                           | 1                       | –                                                                                                                                                                                | –                                                                                                                        | Korwin-Piotrowska 1992 <sup>e50</sup>                                                                                                                                                                                                                                       | –                               |
| Ginkgo biloba                       | C: possibly effective for fatigue<br>A: established as ineffective for cognitive effect                                                                                                                                                                                                                                                                                                                                                                                                                     | 4                       | Lovera 2007 <sup>e51</sup><br>Lovera 2012 <sup>e52</sup>                                                                                                                         | Johnson 2006 <sup>e53</sup><br>Diamond 2013 <sup>e54</sup>                                                               | –                                                                                                                                                                                                                                                                           | –                               |
| Cannabis                            | A: OCE <i>effective</i> for spasticity symptoms (patient-reported only), pain;<br>B: THC <i>probably effective</i> for spasticity symptoms (patient-reported only), pain;<br>Sativex <i>probably effective</i> for subjective spasticity symptoms, pain, no. of voids; OCE/THC <i>probably ineffective</i> for objective spasticity measures short-term;<br>Sativex <i>probably ineffective</i> for objective spasticity measures short-term, no. bladder episodes; OCE/THC <i>probably ineffective</i> for | 20                      | Zajicek 2003, <sup>e55</sup><br>Vaney 2004, <sup>e56</sup><br>Wade 2004, <sup>e57</sup><br>Zajicek 2012, <sup>e58</sup><br>Kavia 2010, <sup>e59</sup><br>Rog 2005 <sup>e60</sup> | Zajicek 2005, <sup>e61</sup><br>Collin 2007, <sup>e62</sup><br>Collin 2010 <sup>e63</sup><br>Freeman 2006 <sup>e54</sup> | Wade 2006, <sup>e65</sup> Svendsen 2004, <sup>e66</sup> Ungerleider 1987, <sup>e67</sup> Aragona 2009, <sup>e68</sup> Centonze 2009, <sup>e56</sup> Fox 2004, <sup>e70</sup> Killestein 2002, <sup>e71</sup> Corey-Bloom 2012, <sup>e72</sup> Greenberg 1994 <sup>e73</sup> | Iskedijian 2007 <sup>e152</sup> |

|                                           |                                                                                                                                                                                                                                                                                                                                                                                                                                                             |   |                                      |                                                      |                                                                                        |                                                                                                                             |
|-------------------------------------------|-------------------------------------------------------------------------------------------------------------------------------------------------------------------------------------------------------------------------------------------------------------------------------------------------------------------------------------------------------------------------------------------------------------------------------------------------------------|---|--------------------------------------|------------------------------------------------------|----------------------------------------------------------------------------------------|-----------------------------------------------------------------------------------------------------------------------------|
|                                           | <p>tremor</p> <p>C: OCE/THC <i>possibly effective</i> for spasticity long-term; Sativex <i>possibly ineffective</i> for tremor</p> <p>U: OCE/THC for overall bladder symptom severity, urge incontinence; synthetic THC for pain; Sativex for overall bladder symptoms, anxiety, sleep problems, cognition, QOL, fatigue, psychopathologic symptoms, abuse potential; smoked cannabis safety/efficacy for spasticity, pain, balance, posture, cognition</p> |   |                                      |                                                      |                                                                                        |                                                                                                                             |
| <b>Dietary supplementation</b>            |                                                                                                                                                                                                                                                                                                                                                                                                                                                             |   |                                      |                                                      |                                                                                        |                                                                                                                             |
| Low-fat diet with omega-3 supplementation | B: ineffective for relapses, disability, MRI lesions, fatigue, QOL                                                                                                                                                                                                                                                                                                                                                                                          | 8 | Torkildsen 2012 <sup>e74</sup>       | Weinstock-Guttman 2005 <sup>e75</sup>                | Bates 1989 <sup>e76</sup>                                                              | Swank 1970, <sup>e153</sup> 1990, <sup>e154</sup> 1991, <sup>e155</sup> 2003 <sup>e156</sup> ; Nordvik 2000 <sup>e157</sup> |
| Linoleic acid                             | U: conflicting evidence on MS-related disability or relapse reduction                                                                                                                                                                                                                                                                                                                                                                                       | 4 | –                                    | Millar 1973, <sup>e77</sup> Paty 1983 <sup>e78</sup> | Bates 1977, <sup>e79</sup> Harbige 2007 <sup>e80</sup>                                 | –                                                                                                                           |
| <b>Supplementation</b>                    |                                                                                                                                                                                                                                                                                                                                                                                                                                                             |   |                                      |                                                      |                                                                                        |                                                                                                                             |
| Creatine                                  | U                                                                                                                                                                                                                                                                                                                                                                                                                                                           | 2 |                                      | Lambert 2003 <sup>e81</sup>                          | Malin 2008 <sup>e82</sup>                                                              | –                                                                                                                           |
| Acetyl-L-carnitine                        | U: conflicting evidence                                                                                                                                                                                                                                                                                                                                                                                                                                     | 1 | –                                    | Tomassini 2004 <sup>e83</sup>                        | –                                                                                      | –                                                                                                                           |
| Inosine                                   | U: conflicting evidence                                                                                                                                                                                                                                                                                                                                                                                                                                     | 4 | –                                    | Gonsette 2010 <sup>e84</sup>                         | Spitsin 2001, <sup>e85</sup> Toncev 2006, <sup>e86</sup> Markowitz 2009 <sup>e87</sup> | –                                                                                                                           |
| Lofepamine plus phenylalanine with B12    | C: possibly ineffective for disability, symptoms, depression, fatigue                                                                                                                                                                                                                                                                                                                                                                                       | 1 | –                                    | Wade 2002 <sup>e89</sup>                             | –                                                                                      | –                                                                                                                           |
| Threonine                                 | U                                                                                                                                                                                                                                                                                                                                                                                                                                                           | 1 | –                                    | –                                                    | Hauser 1992 <sup>e90</sup>                                                             | –                                                                                                                           |
| Glucosamine sulfate                       | U                                                                                                                                                                                                                                                                                                                                                                                                                                                           | 1 | Shaygannejad 2010 <sup>e91</sup>     | --                                                   | --                                                                                     | --                                                                                                                          |
| LDN                                       | U                                                                                                                                                                                                                                                                                                                                                                                                                                                           | 3 | Sharafaddinzadeh 2010 <sup>e92</sup> | Cree 2010 <sup>e93</sup>                             | –                                                                                      | Gironi 2008 <sup>e158</sup>                                                                                                 |

| <b>Other biologically based practices</b>    |                                                                                                                                                                         |    |                                    |                                                                                                                                                         |                                                                                                                                                                |                              |
|----------------------------------------------|-------------------------------------------------------------------------------------------------------------------------------------------------------------------------|----|------------------------------------|---------------------------------------------------------------------------------------------------------------------------------------------------------|----------------------------------------------------------------------------------------------------------------------------------------------------------------|------------------------------|
| Bee venom treatment                          | U                                                                                                                                                                       | 2  | –                                  | Wesselius 2005 <sup>e94</sup>                                                                                                                           |                                                                                                                                                                | Hauser 2001 <sup>e159</sup>  |
| Transdermal histamine                        | U                                                                                                                                                                       | 2  | –                                  | –                                                                                                                                                       | Gillson 2002 <sup>e95</sup>                                                                                                                                    | Gillson 1999 <sup>e160</sup> |
| Hyperbaric oxygen                            | U: conflicting evidence                                                                                                                                                 | 12 | Fischer 1983 <sup>e96</sup>        | Barnes 1985, <sup>e97</sup><br>Wiles 1986, <sup>e98</sup><br>Oriani 1990, <sup>e99</sup><br>Harpur 1986, <sup>e100</sup><br>Neiman 1985 <sup>e101</sup> | Slater 1985, <sup>e102</sup> Sparacia<br>1998, <sup>e103</sup> Wood 1985, <sup>e104</sup><br>Kindwall 1991, <sup>e105</sup><br>Meneghetti 1990 <sup>e106</sup> | Webster 1989 <sup>e161</sup> |
| <b>Manipulative and body-based practices</b> |                                                                                                                                                                         |    |                                    |                                                                                                                                                         |                                                                                                                                                                |                              |
| Reflexology                                  | C: possibly effective for MS-related paresthesias.<br>U: pain, HRQOL, disability, spasticity, fatigue, cognition, bowel/bladder function, depression, anxiety, insomnia | 5  | Hughes 2009 <sup>e110</sup>        | Siev-Ner 2003 <sup>e111</sup><br>Miller 2013 <sup>e112</sup>                                                                                            | Mackereth 2009 <sup>e113</sup>                                                                                                                                 | Joyce 1997 <sup>e162</sup>   |
| Yoga                                         | U                                                                                                                                                                       | 4  | –                                  | –                                                                                                                                                       | Oken 2004, <sup>e114</sup> Ahamadi<br>2010, <sup>e115</sup> Velikonja 2010, <sup>e116</sup><br>Garrett 2012 <sup>e117</sup>                                    | –                            |
| Hippotherapy                                 | U: conflicting data                                                                                                                                                     | 3  | –                                  | –                                                                                                                                                       | Hammer 2005, <sup>e107</sup> Mackay-<br>Lyons 1988, <sup>e108</sup> Silkwood-<br>Sherer 2007 <sup>e109</sup>                                                   | –                            |
| Massage therapy                              | U                                                                                                                                                                       | 4  | –                                  | –                                                                                                                                                       | Hernandez-Reif 1998, <sup>e118</sup><br>Finch 2007, <sup>e119</sup> McClurg<br>2011, <sup>e120</sup> Negahban<br>2013 <sup>e121</sup>                          | –                            |
| Acupuncture                                  | U                                                                                                                                                                       | 1  | --                                 | --                                                                                                                                                      | Donnellan 2008 <sup>e122</sup>                                                                                                                                 | --                           |
| Electroacupuncture                           | U                                                                                                                                                                       | 1  |                                    |                                                                                                                                                         | Quispe Cabanillas 2012 <sup>e123</sup>                                                                                                                         |                              |
| Progressive muscle relaxation                | U                                                                                                                                                                       | 3  |                                    | --                                                                                                                                                      | Mackereth 2009, <sup>e113</sup> Ghafari<br>2009 <sup>e124</sup>                                                                                                | Jensen 2009 <sup>e163</sup>  |
| <b>Energy medicine</b>                       |                                                                                                                                                                         |    |                                    |                                                                                                                                                         |                                                                                                                                                                |                              |
| Magnetic therapy                             | B: probably effective for fatigue; probably ineffective for depression.<br>U: disability, bladder control, spasticity, cognition, mobility, sensation, vision           | 6  | Piatkowski<br>2009 <sup>e125</sup> | Richards 1997 <sup>e126</sup><br>Lopes De<br>Carvalho <sup>e127</sup>                                                                                   | Mostert 2005, <sup>e128</sup> Lappin<br>2003, <sup>e129</sup> Nielsen 1995 <sup>e130</sup>                                                                     | –                            |
| Neural therapy                               | U                                                                                                                                                                       | 1  | –                                  | Gibson 1999 <sup>e131</sup>                                                                                                                             | Gibson 1999 <sup>e131</sup>                                                                                                                                    | –                            |

|                       |   |   |    |    |                             |    |
|-----------------------|---|---|----|----|-----------------------------|----|
|                       |   |   |    |    |                             |    |
| <b>Other medicine</b> |   |   |    |    |                             |    |
| Naturopathic medicine | U | 1 | -- | -- | Shinto 2008 <sup>e132</sup> | -- |

HRQOL = Health-related quality of life, LDN = Low-dose naltrexone, OCE = Oral cannabis extract, QOL = Quality of life, THC = Tetrahydrocannabinol.

Studies cited using reference list in full-length guideline article (appearing in as an online-only data supplement).
