# Supplementary material
Source: PubMed Central journal article supplement (PMC3962995)
Supplement: supp_82.12.1083_Table_e-3.pdf [file supp_82.12.1083_Table_e-3.pdf]

**Table e-3 CAM therapies with no evidence from studies in multiple sclerosis**

| <b>Mind–body medicine</b>                                                                                                        | <b>Biologically based therapies</b>                                                                                                                                                                                                                                                                                                                                                                                                                                                                                                   | <b>Manipulative and body-based systems</b>                                                                                                                                 | <b>Other therapies</b>                                                                                                                                                                                                                           |
|----------------------------------------------------------------------------------------------------------------------------------|---------------------------------------------------------------------------------------------------------------------------------------------------------------------------------------------------------------------------------------------------------------------------------------------------------------------------------------------------------------------------------------------------------------------------------------------------------------------------------------------------------------------------------------|----------------------------------------------------------------------------------------------------------------------------------------------------------------------------|--------------------------------------------------------------------------------------------------------------------------------------------------------------------------------------------------------------------------------------------------|
| <ul style="list-style-type: none"> <li>• Guided imagery</li> <li>• Prayer</li> <li>• Religion</li> <li>• Spirituality</li> </ul> | <p><i>Herbs</i></p> <ul style="list-style-type: none"> <li>• Ashwagandha</li> <li>• Blue green algae</li> <li>• Caffeine</li> <li>• Coffee</li> <li>• Cranberry</li> <li>• Echinacea</li> <li>• Epigallocatechin gallate</li> <li>• Ephedra</li> <li>• Grape seed</li> <li>• Green tea</li> <li>• Kava kava</li> <li>• Ma huang</li> <li>• Oligomeric proanthocyanidin</li> <li>• Psyllium</li> <li>• Pycnogenol</li> <li>• St. Johns Wort</li> <li>• Skullcap</li> <li>• Spirulina</li> <li>• Valerian</li> <li>• Yohimbe</li> </ul> | <ul style="list-style-type: none"> <li>• Chiropractic medicine</li> <li>• Craniosacral therapy</li> <li>• Pilates</li> <li>• Tai-chi</li> <li>• Trager approach</li> </ul> | <p><i>Vitamins and minerals</i></p> <ul style="list-style-type: none"> <li>• Folic acid</li> <li>• Magnesium</li> <li>• Selenium</li> <li>• Vitamin A</li> <li>• Vitamin B<sub>12</sub></li> <li>• Vitamin E</li> <li>• Zinc</li> </ul>          |
|                                                                                                                                  | <p><i>Other supplementation</i></p> <ul style="list-style-type: none"> <li>• Carnitine</li> <li>• Chondroitin</li> <li>• Coenzyme Q10</li> <li>• Curcumin</li> <li>• Dehydroepiandrosterone</li> <li>• Flavonoids</li> <li>• Germanium</li> <li>• Lipoic acid</li> <li>• Luteolin</li> <li>• Mangosteen</li> <li>• Melatonin</li> <li>• Oral myelin or oral brain</li> <li>• Quercetin</li> <li>• Turmeric</li> </ul>                                                                                                                 |                                                                                                                                                                            | <p><i>Miscellaneous therapies</i></p> <ul style="list-style-type: none"> <li>• Amalgam replacement</li> <li>• Aspartame</li> <li>• Chelation therapy</li> <li>• Chinese medicine</li> <li>• Colloidal silver</li> <li>• Radon therapy</li> </ul> |

| Mind–body medicine | Biologically based therapies                                                                                                                                                                                                                  | Manipulative and body-based systems | Other therapies                                                                                                                 |
|--------------------|-----------------------------------------------------------------------------------------------------------------------------------------------------------------------------------------------------------------------------------------------|-------------------------------------|---------------------------------------------------------------------------------------------------------------------------------|
|                    | <i>Dietary supplementation</i> <ul style="list-style-type: none"> <li>• Gluten-free diet</li> <li>• Lorenzo’s oil</li> </ul>                                                                                                                  |                                     | <i>Energy therapy</i> <ul style="list-style-type: none"> <li>• Therapeutic touch</li> </ul>                                     |
|                    | <i>Other biologically based practices</i> <ul style="list-style-type: none"> <li>• Candida treatment</li> <li>• Colon therapy</li> <li>• Detoxification</li> <li>• Enzyme therapy</li> <li>• Hydrolytic enzymes</li> <li>• Mercury</li> </ul> |                                     | <i>Alternative medical systems</i> <ul style="list-style-type: none"> <li>• Ayurvedic medicine</li> <li>• Homeopathy</li> </ul> |

CAM = Complementary and alternative medicine, EAP = Ethylamino-phosphate.
